# Supplementary material for: Total Synthesis and Stereochemical Assignment of Nostosin B
Source: PubMed Central journal article supplement (PMC5367015; doi:10.3390/md15030058), 2017-02-27

*Supplementary Spectra*

**Total Synthesis and Stereochemical Assignment of  
Nostosin B**



NMR spectra of compound 16 (Bruker 500 MHz, CDCl<sub>3</sub>)

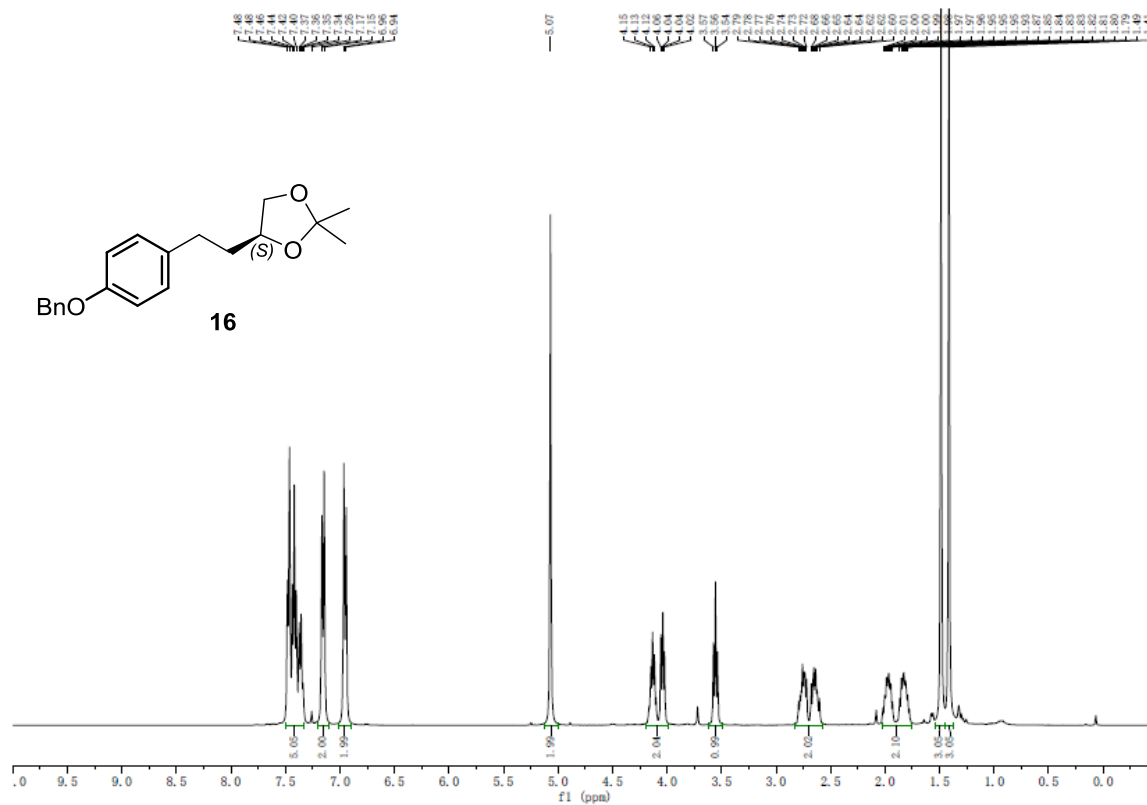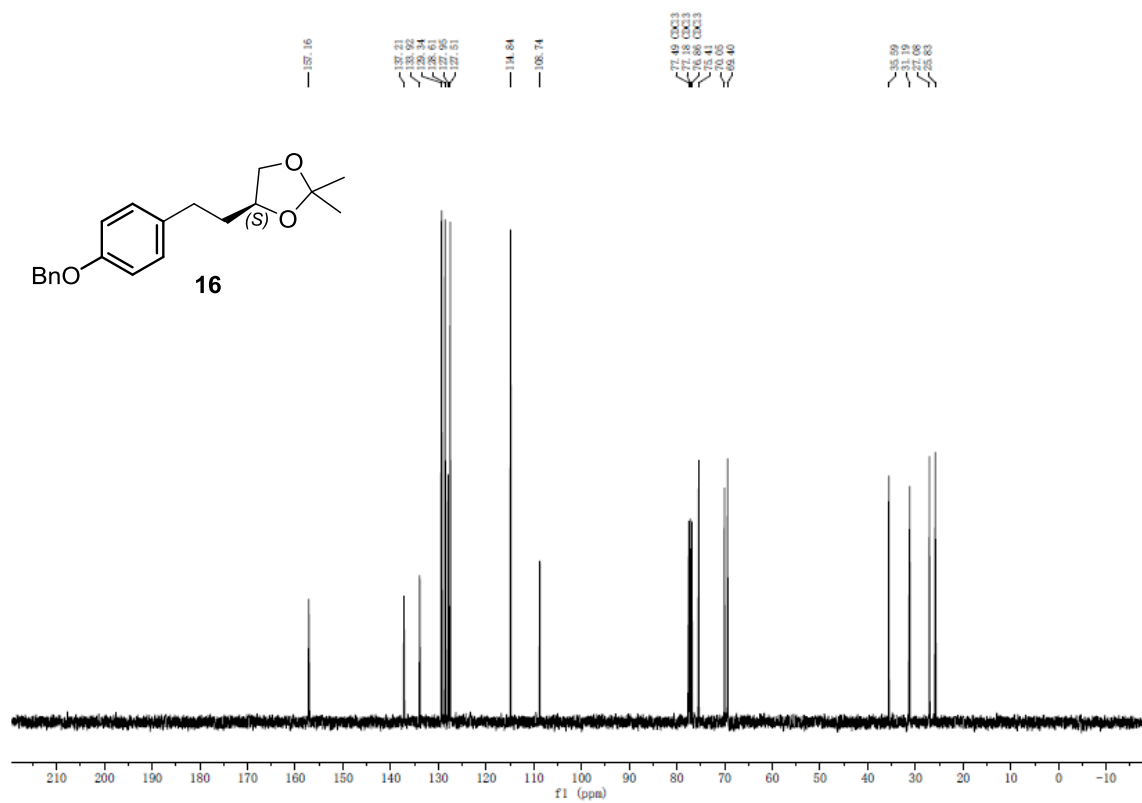

# NMR spectra of compound S1 (Bruker 500 MHz, CDCl<sub>3</sub>)

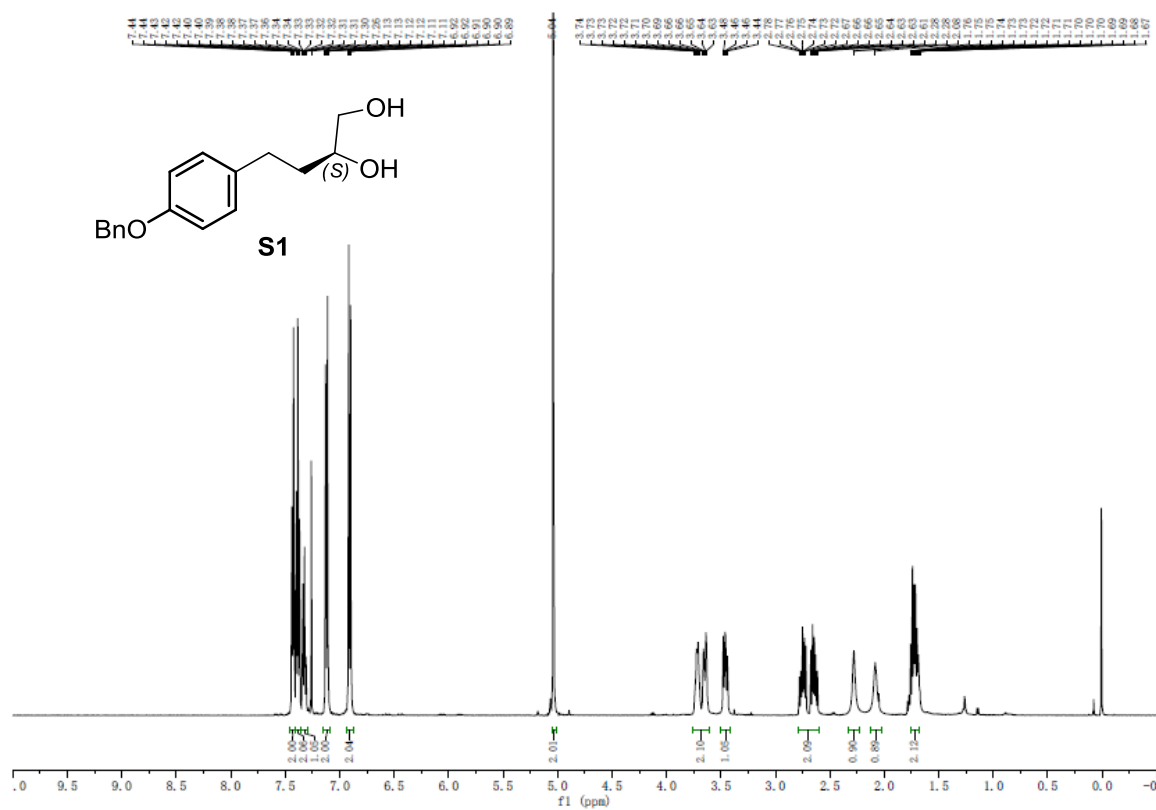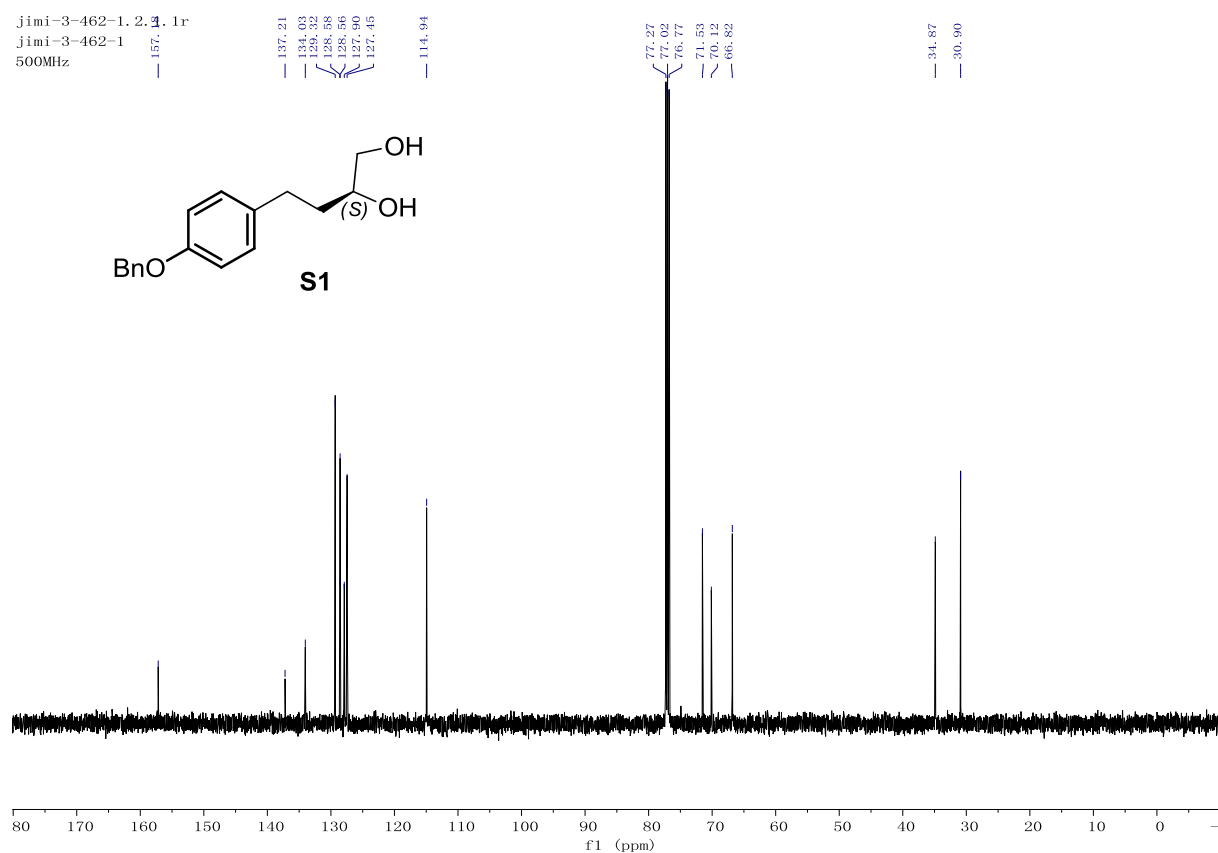

NMR spectra of compound 17 (Bruker 500 MHz, CDCl<sub>3</sub>)

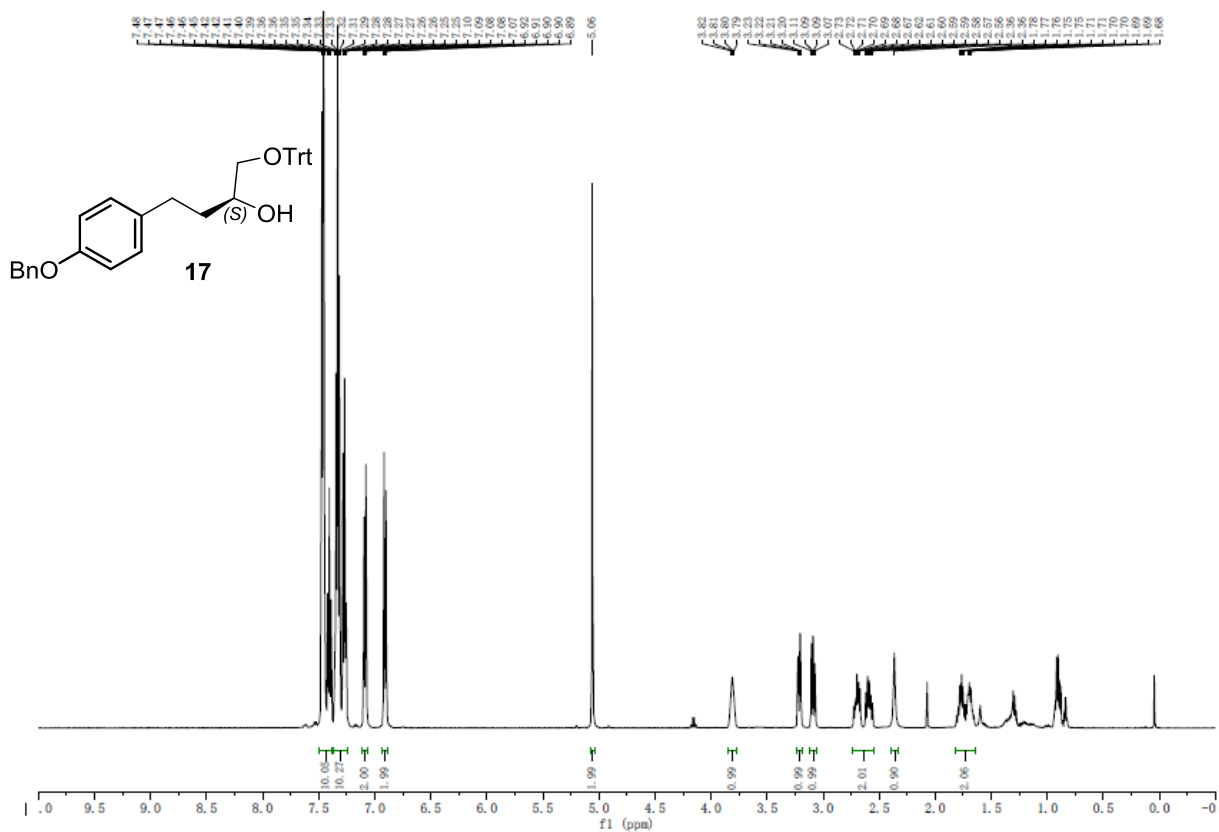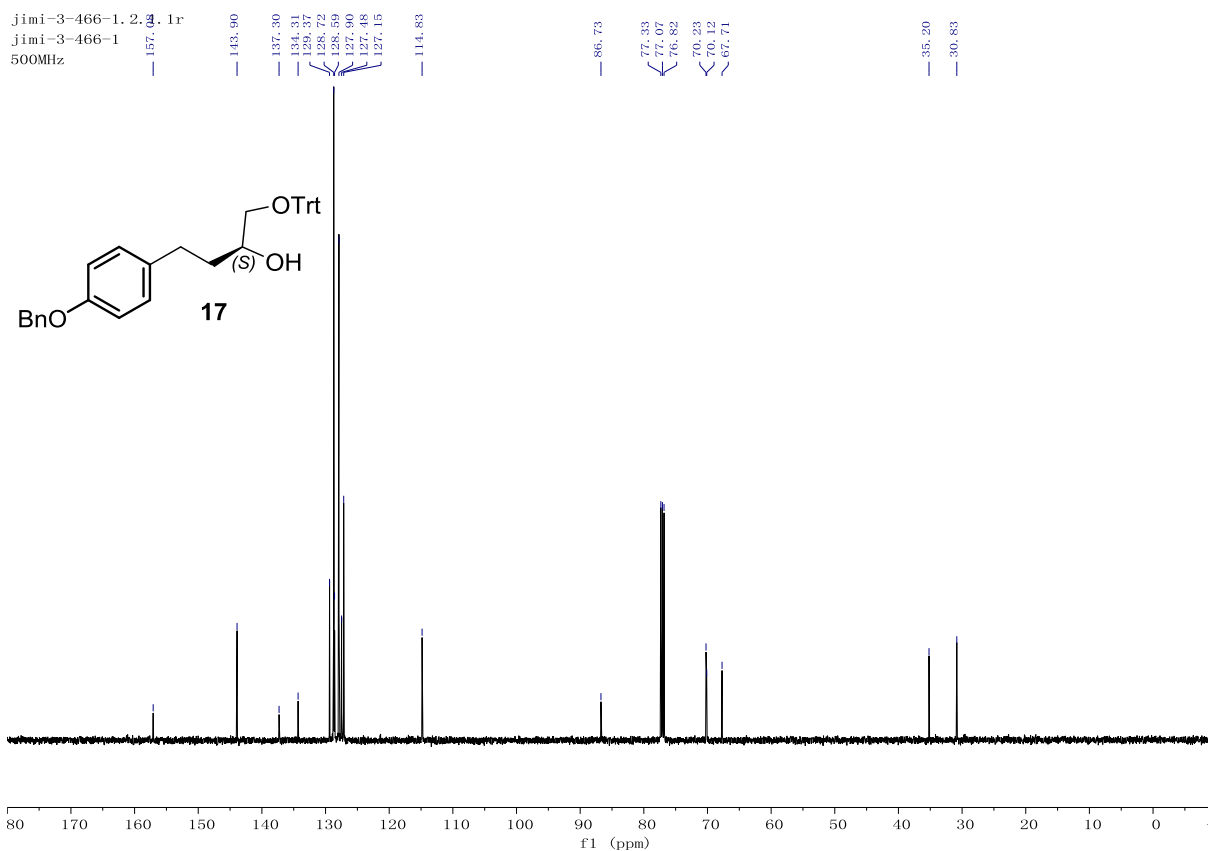

# NMR spectra of compound S2 (Bruker 400 MHz, CDCl<sub>3</sub>)

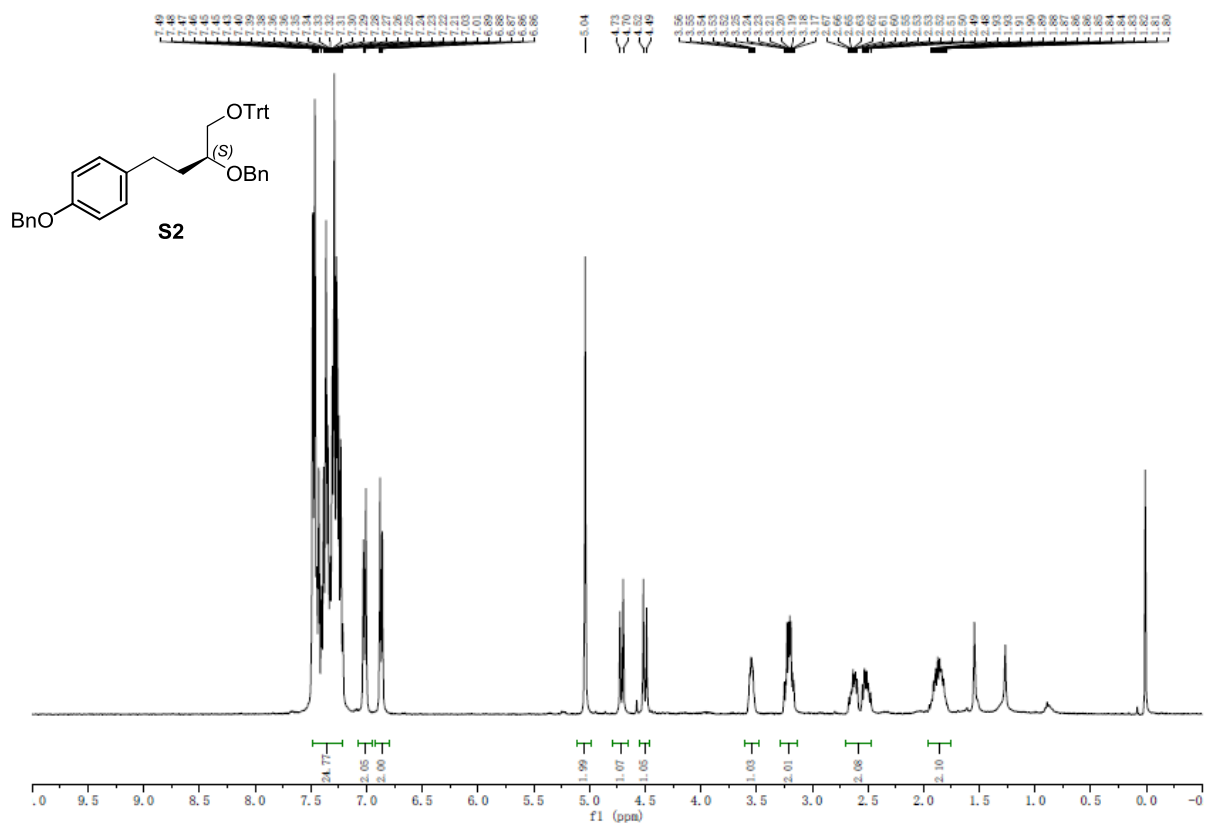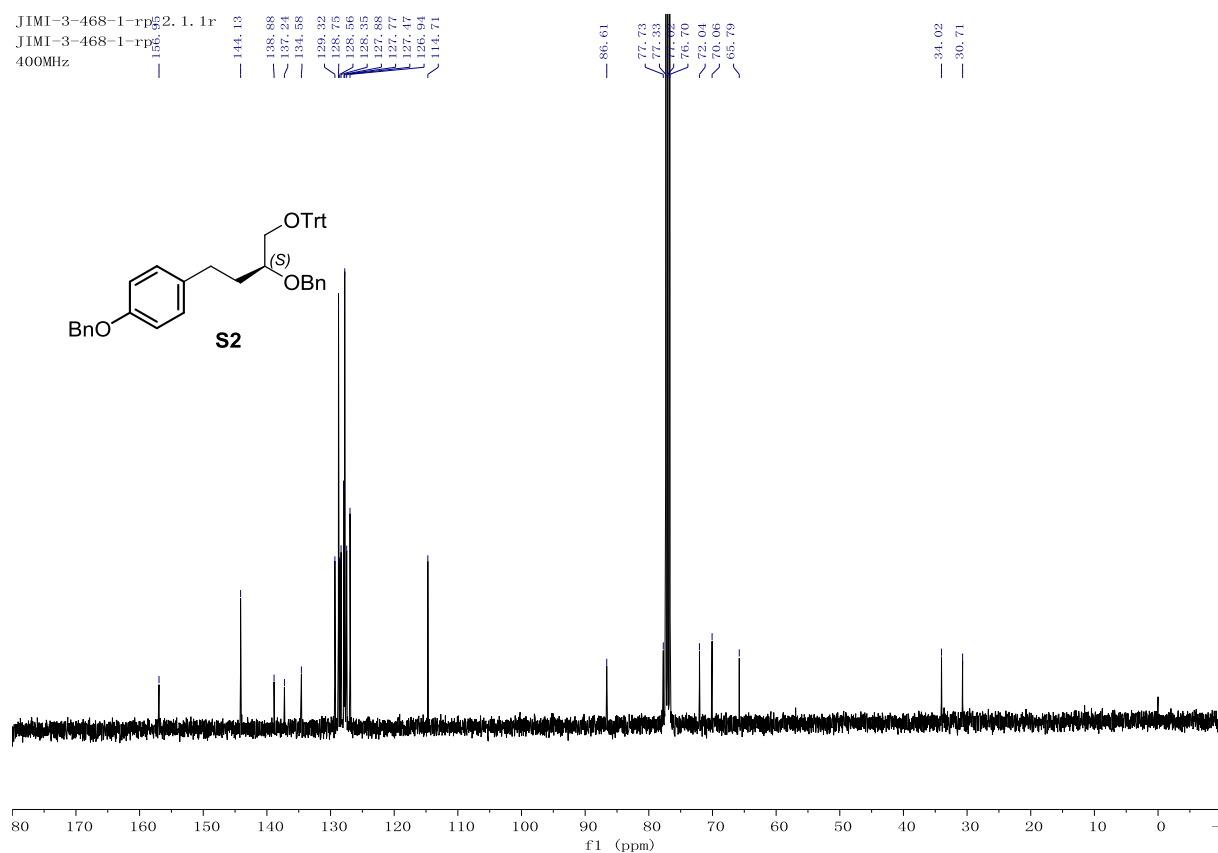







# NMR spectra of compound S3 (Bruker 500 MHz, CDCl<sub>3</sub>)

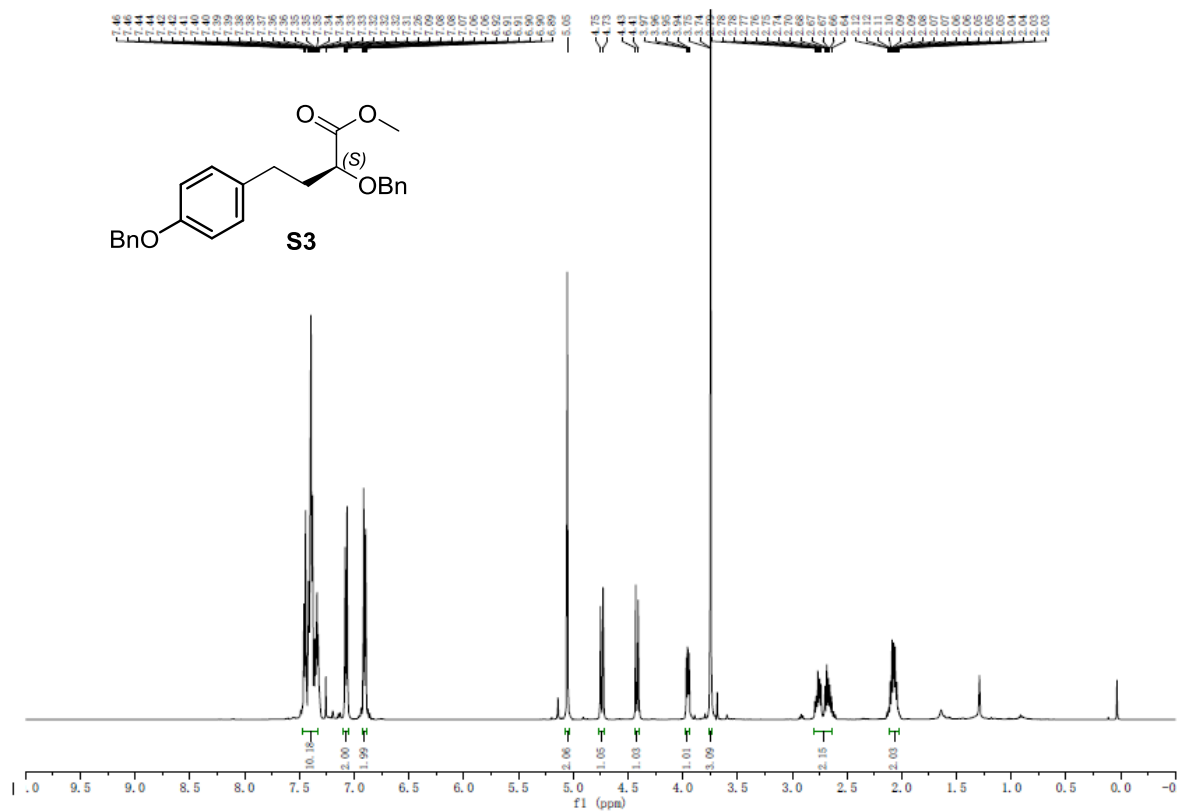

jimi-4-485. 2. 1. 15  
jimi-4-485  
500MHz

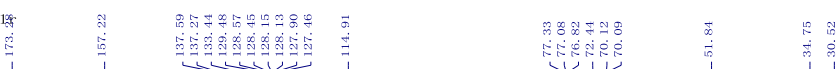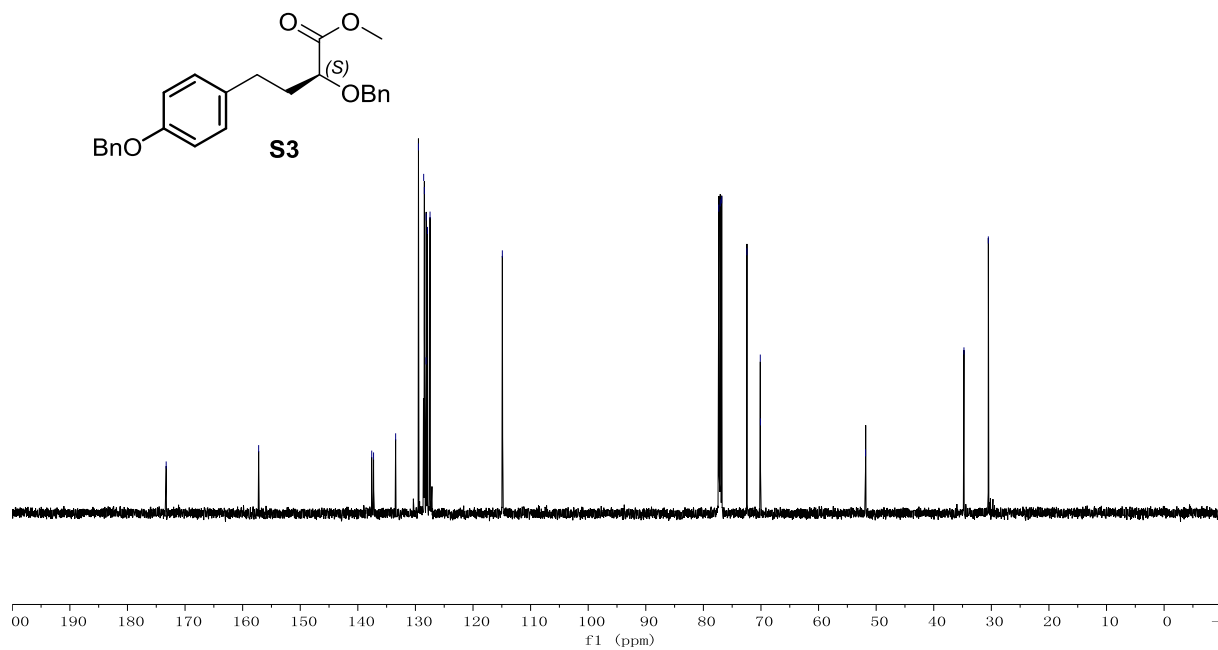

NMR spectra of compound S4 (Bruker 300 MHz, CDCl<sub>3</sub>)

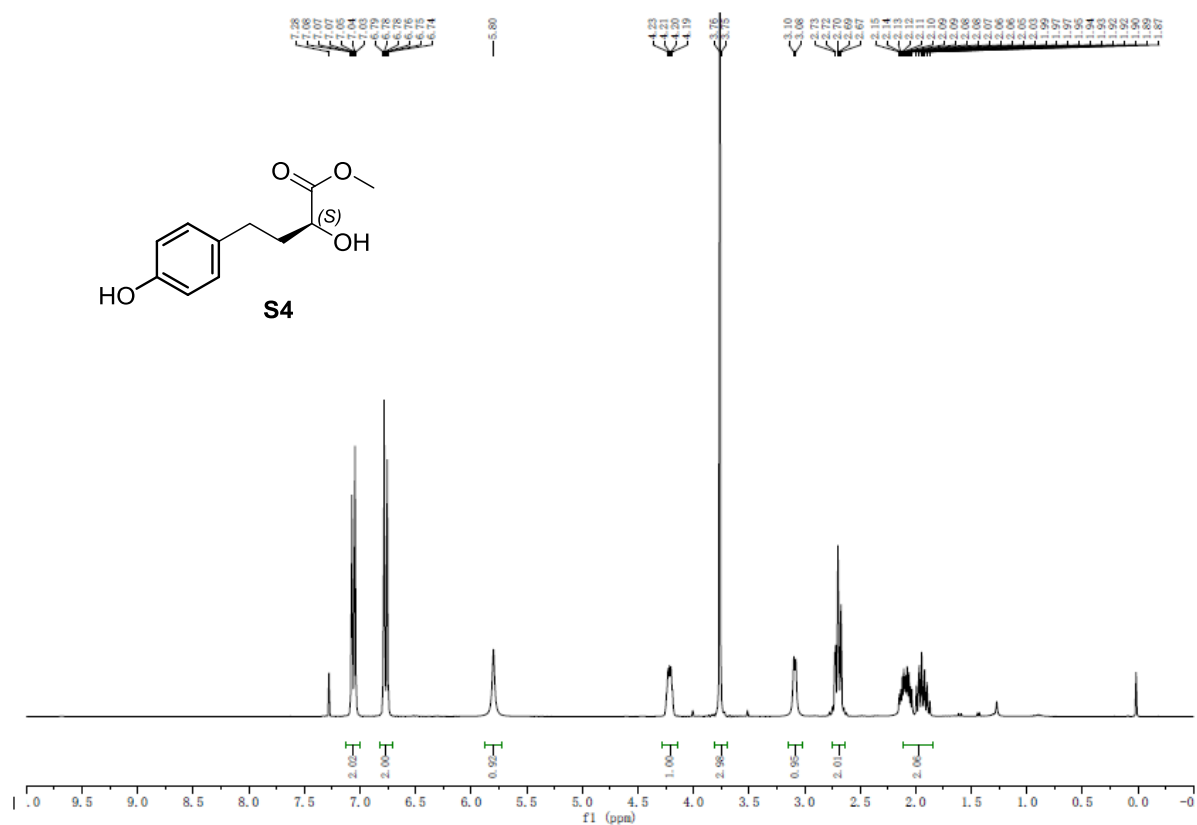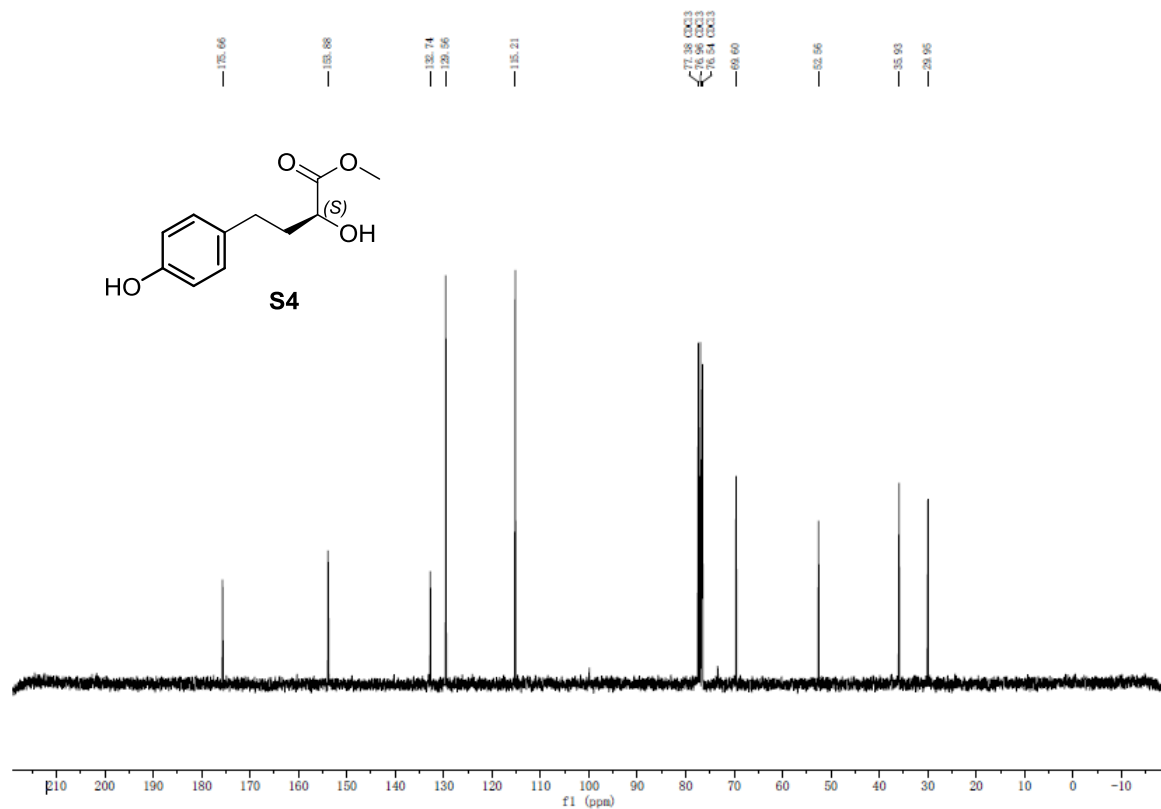

# NMR spectra of compound 19 (Bruker 300 MHz, CDCl<sub>3</sub>)

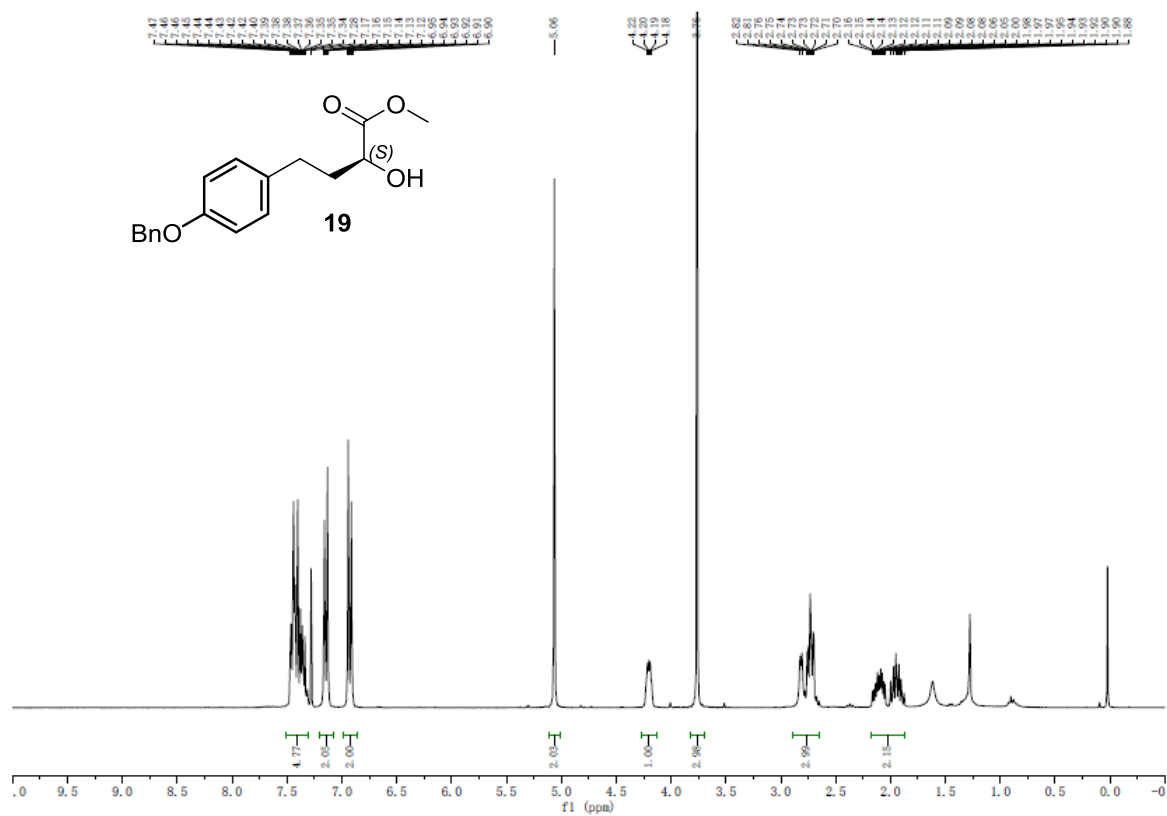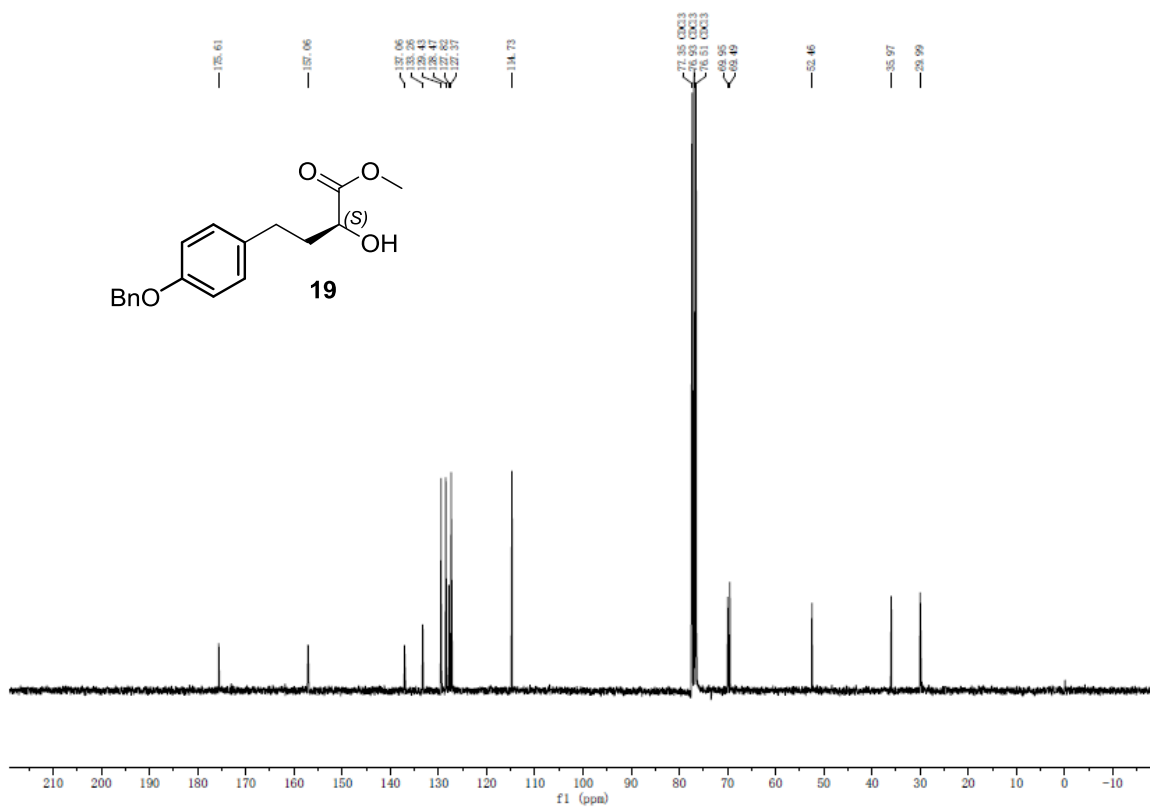

NMR spectra of compound 20 (Bruker 300 MHz, CDCl<sub>3</sub>)

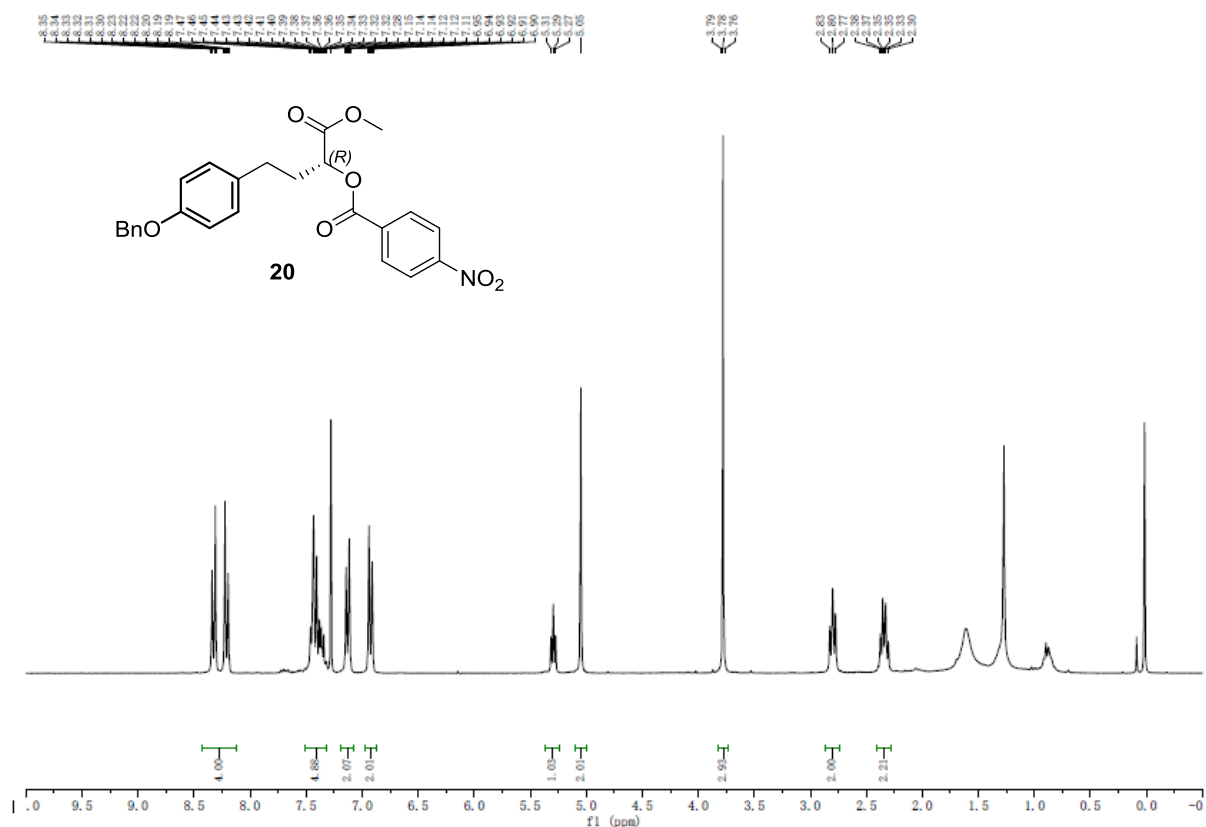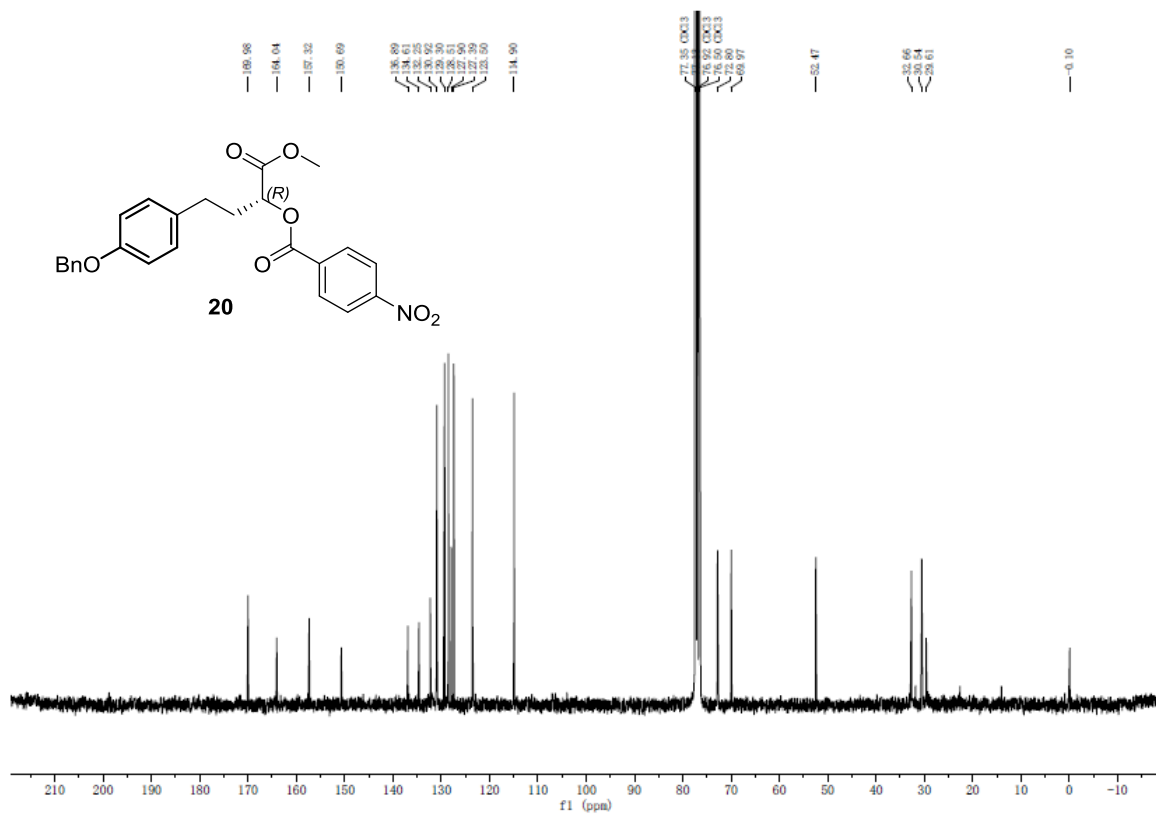

# NMR spectra of compound 22 (Bruker 500 MHz, CDCl<sub>3</sub>)

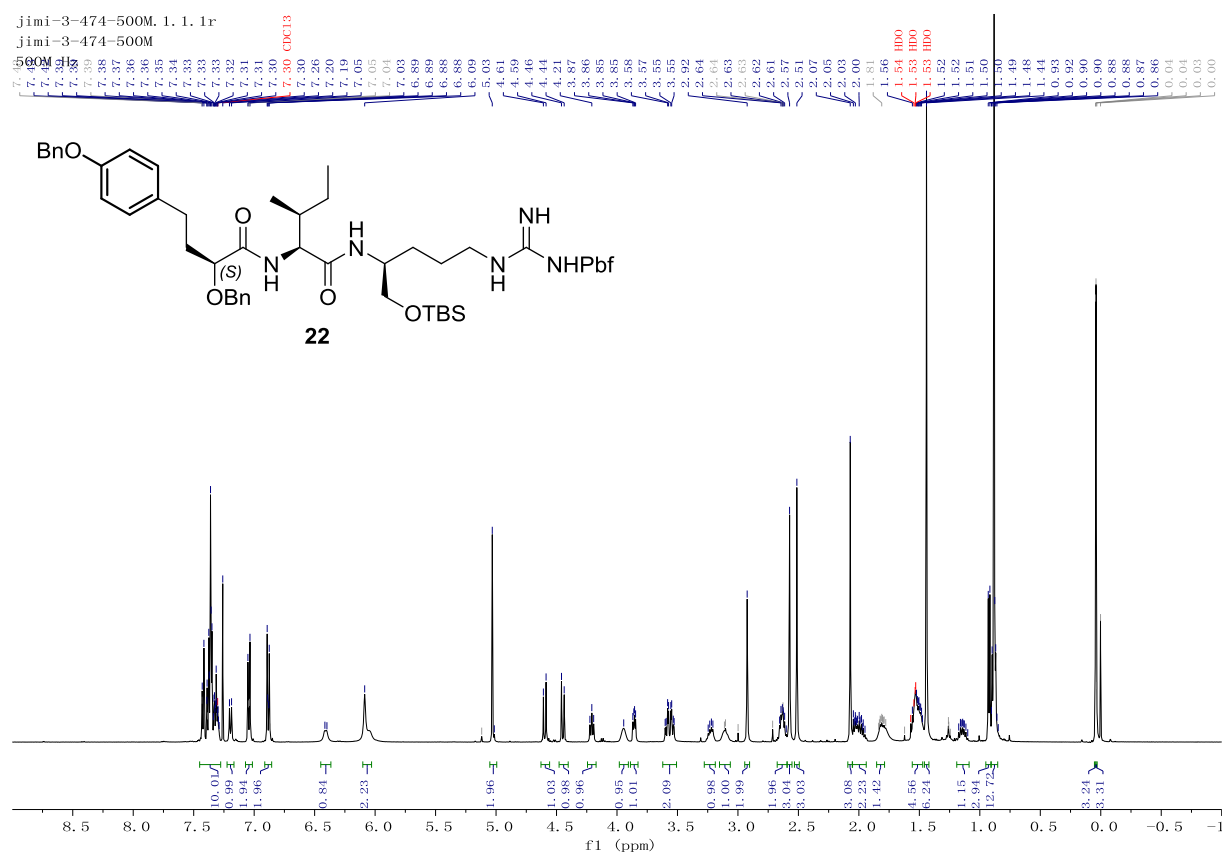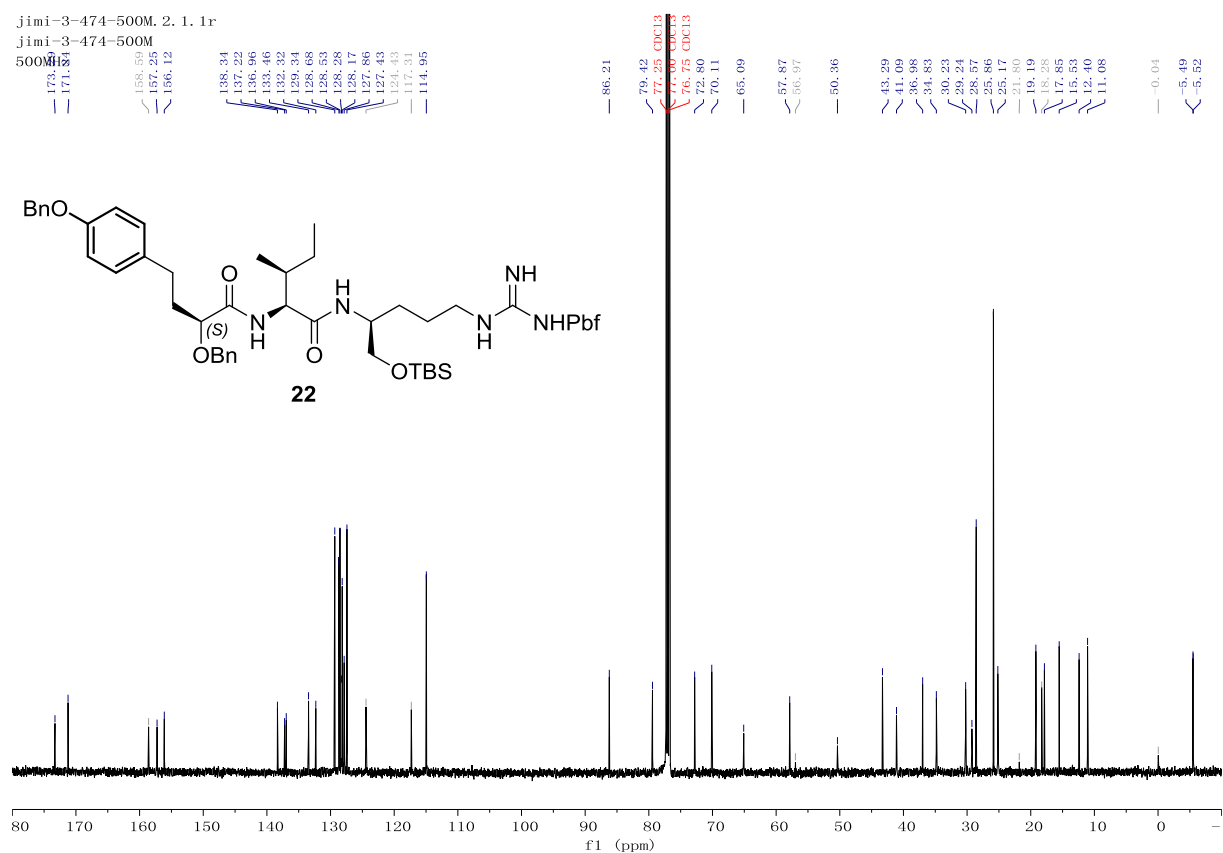

Supplement: marinedrugs-15-00058-s001.pdf [file marinedrugs-15-00058-s001.pdf]
